# Supplementary material
Source: PubMed Central journal article supplement (PMC3527119)

# Supplemental Material

Figure S1

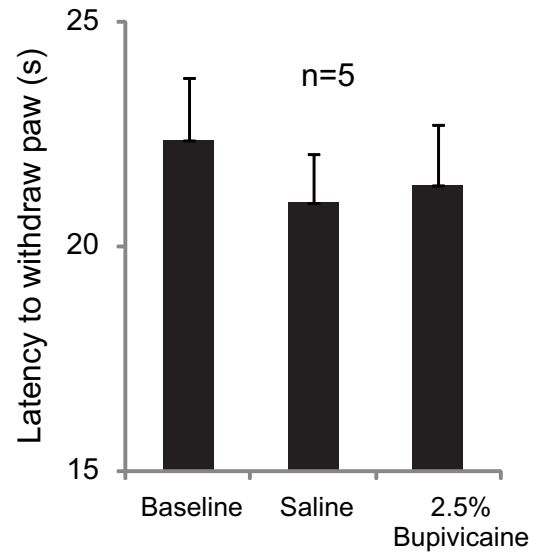

Supplement: npp2012189x2.pdf [file npp2012189x2.pdf]

# Figure S2

## A

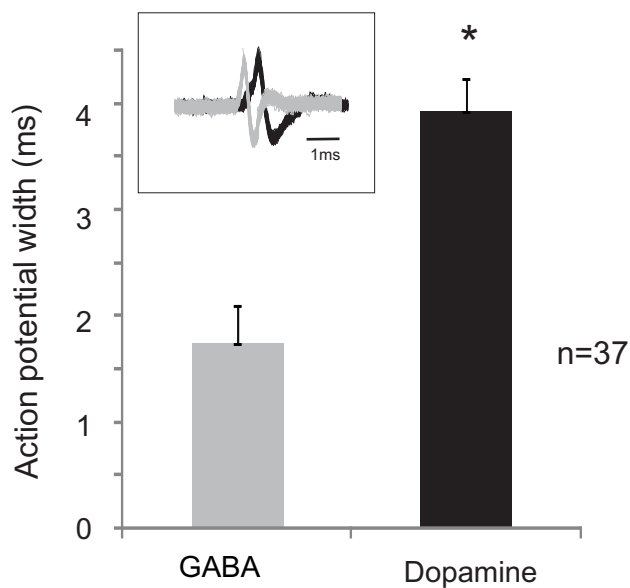

## B

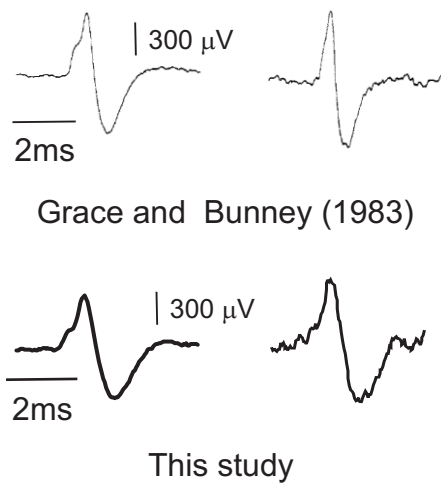

## C

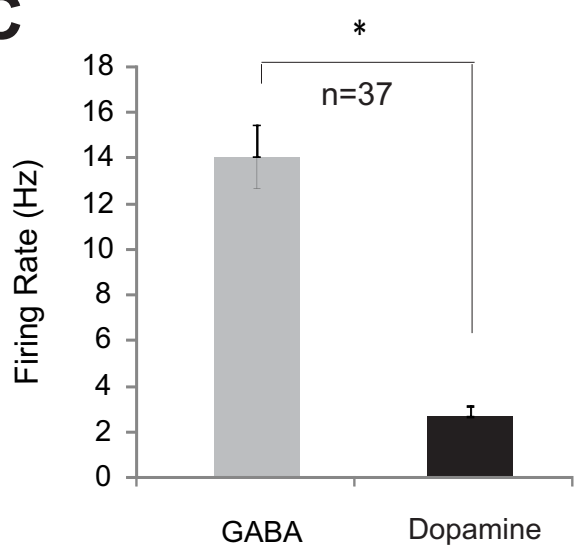

## D

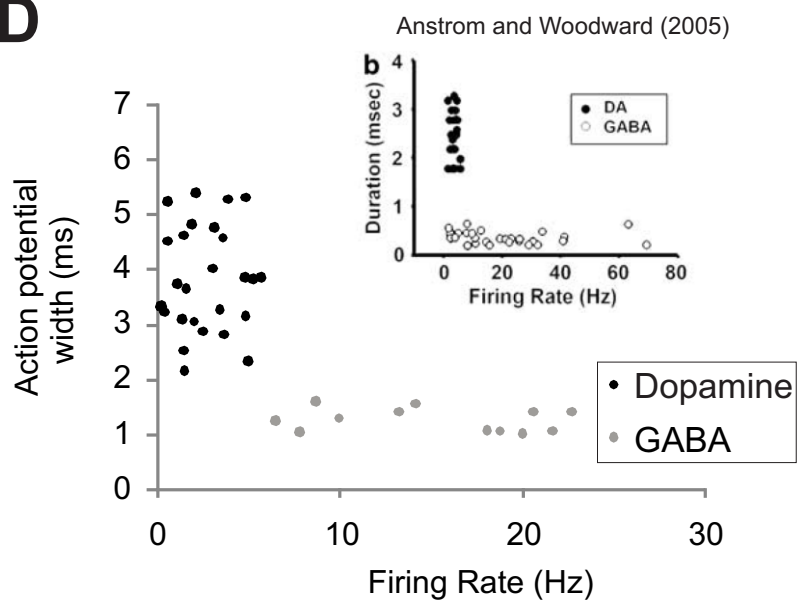

Supplement: npp2012189x3.pdf [file npp2012189x3.pdf]

# Figure S3

## A

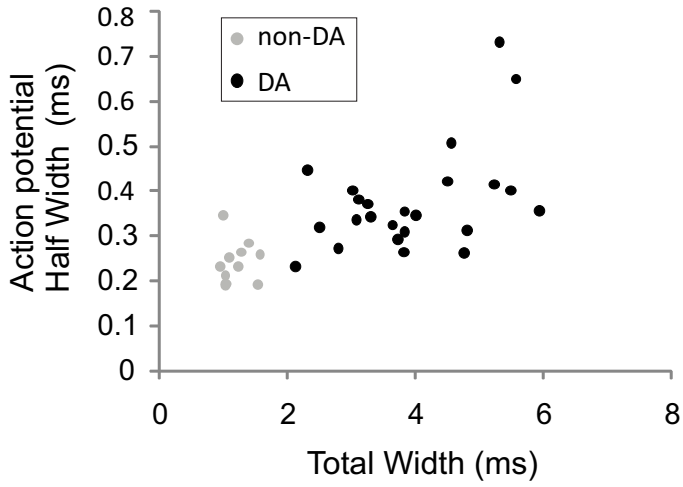

## B

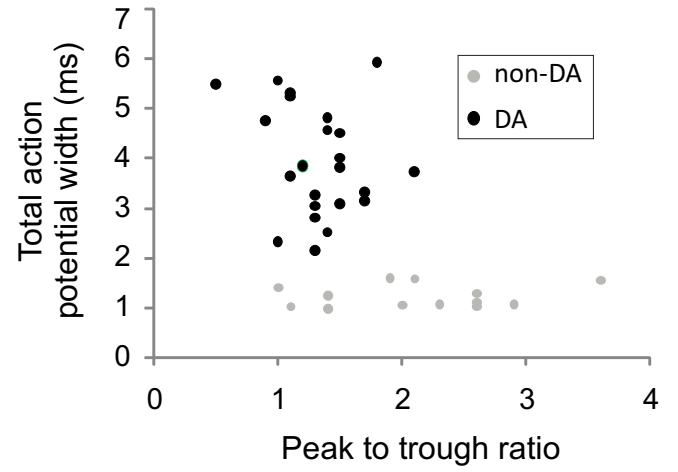

## C

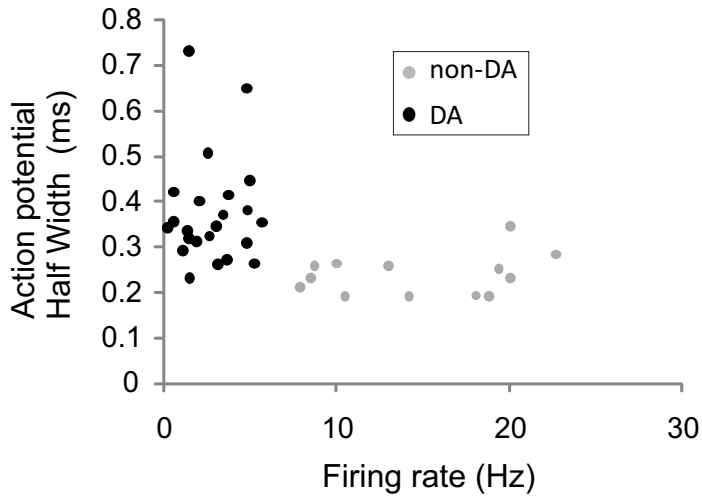

## D

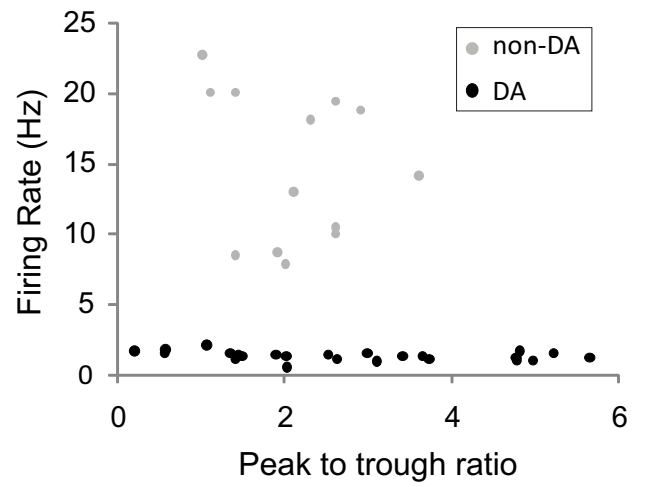

Supplement: npp2012189x4.pdf [file npp2012189x4.pdf]

# Figure S4

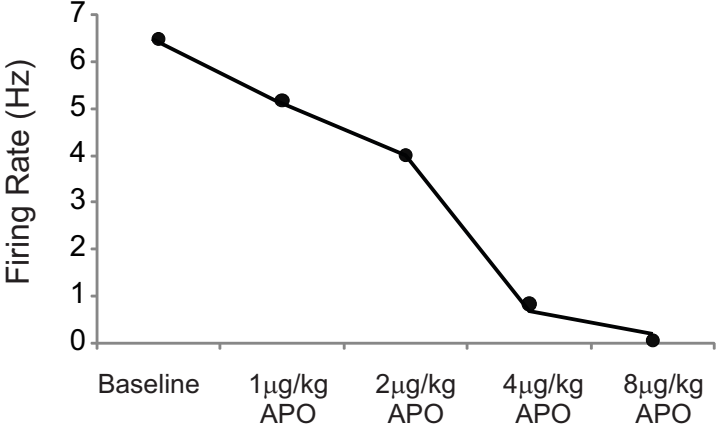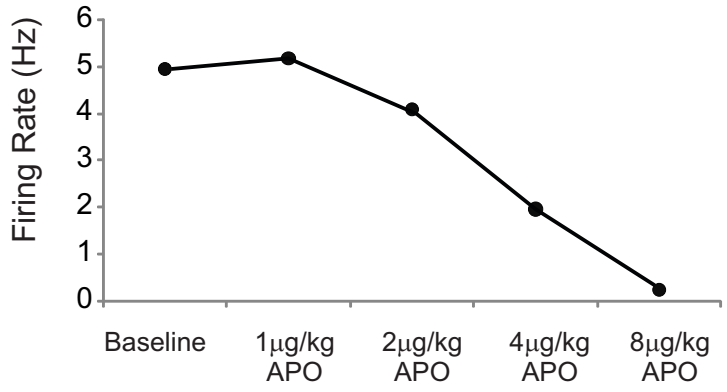

Supplement: npp2012189x5.pdf [file npp2012189x5.pdf]
